# Supplementary material
Source: publisher figshare collection journal article supplement (https://frontiersin.figshare.com/ndownloader/files/12925967)
Supplement: Supplementary file [file 12925967]

## *Supplementary Material*

### **CD18 regulates monocyte hematopoiesis and promotes resistance to experimental schistosomiasis**

**Camila Oliveira Silva Souza<sup>1¶</sup>, Milena Sobral Espíndola<sup>1¶,#a</sup>, Caroline Fontanari<sup>1</sup>, Morgana Kelly B. Prado<sup>1</sup>, Fabiani Gai Frantz<sup>1</sup>, Vanderlei Rodrigues<sup>2</sup>, Luiz Gustavo Gardinassi<sup>1</sup>, Lúcia Helena Faccioli<sup>1\*</sup>**

**\* Correspondence:**

Lúcia Helena Faccioli, PhD  
faccioli@fcfrp.usp.br

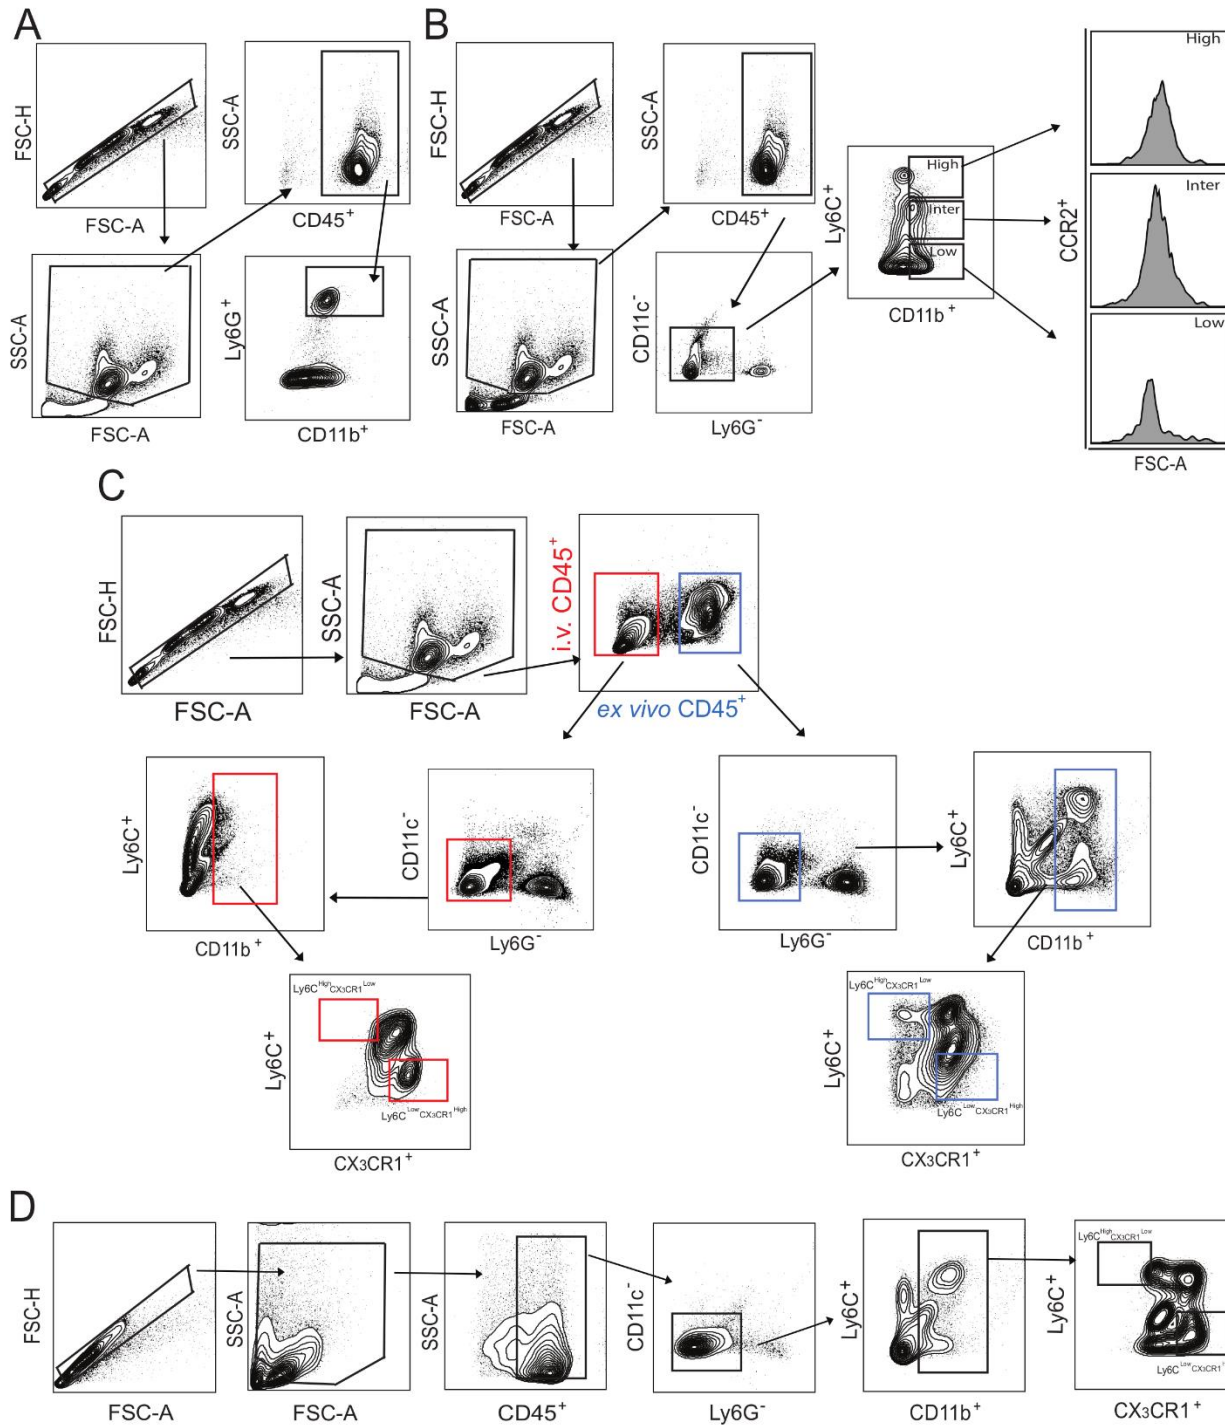

**Fig. S1 - Flow cytometric gating strategy.** (A) Contour plots show representative flow cytometric gating hierarchy for analysis of FSC-H/ FSC-A, SSC-A/ FSC-A followed by CD45<sup>+</sup> CD11b<sup>+</sup> Ly6G<sup>+</sup> neutrophils. (B) Contour plots show representative flow cytometric data and gating hierarchy for analysis of FSC-H/ FSC-A, SSC-A/ FSC-A followed CD45<sup>+</sup> CD11c<sup>-</sup> Ly6G<sup>-</sup> CD11b<sup>+</sup> Ly6C<sup>+</sup> monocyte subsets and subsequent CCR2 mean fluorescence intensity (MFI) calculated for each monocyte subset. (C) Contour plots show representative flow cytometric gating hierarchy for analysis of intravascular

leukocyte staining, in which cells were characterized by FSC-H/ FSC-A, SSC-A/ FSC-A followed by intravascular or *ex vivo* CD45<sup>+</sup> CD11c<sup>-</sup> Ly6G<sup>-</sup> CD11b<sup>+</sup> Ly6C<sup>+</sup> CX3CR1<sup>+</sup>. **(D)** Contour plots show representative flow cytometric gating hierarchy for analysis of FSC-H/ FSC-A, SSC-A/ FSC-A followed by CD45<sup>+</sup> CD11c<sup>-</sup> Ly6G<sup>-</sup> CD11b<sup>+</sup> Ly6C<sup>high</sup> CX3CR1<sup>low</sup> inflammatory (upper gate) or Ly6C<sup>low</sup> CX3CR1<sup>high</sup> patrolling monocytes (lower gate).
